# Supplementary material for: Melleolides impact fungal translation via elongation factor 2
Source: Royal Society of Chemistry journal article supplement (doi:10.1039/c9ob00562e), 2019-01-01
Supplement: c9ob00562e1.pdf [file c9ob00562e1.pdf]

## Melleolides impact fungal translation via Elongation Factor 2

Maximilian Dörfer,<sup>a</sup> Daniel Heine,<sup>b</sup> Stefanie König,<sup>c</sup> Sagar Gore,<sup>d</sup> Oliver Werz,<sup>c</sup> Christian Hertweck,<sup>b</sup> Markus Gressler,<sup>a</sup> Dirk Hoffmeister<sup>a,\*</sup>

<sup>a</sup> Department Pharmaceutical Microbiology at the Hans Knöll Institute, Friedrich-Schiller-University, Beutenbergstrasse 11a, 07745 Jena, Germany

<sup>b</sup> Department Biomolecular Chemistry, Leibniz Institute for Natural Product Chemistry and Infection Biology - Hans Knöll Institute, Beutenbergstrasse 11a, 07745 Jena, Germany

<sup>c</sup> Department Pharmaceutical and Medicinal Chemistry, Friedrich-Schiller-University Jena, Philosophenweg 14, 07743 Jena, Germany

<sup>d</sup> Department Systems Biology and Bioinformatics, Leibniz Institute for Natural Product Chemistry and Infection Biology - Hans Knöll Institute, Beutenbergstrasse 11a, 07745 Jena, Germany

\*Correspondence: Dirk Hoffmeister, Markus Gressler, Department Pharmaceutical Microbiology at the Hans Knöll Institute, Friedrich-Schiller-University, Beutenbergstrasse 11a, 07745 Jena, Germany; Phone: +49-3641-949851; Fax: +49-3641-949852; e-mail: [dirk.hoffmeister@hki-jena.de](mailto:dirk.hoffmeister@hki-jena.de), [markus.gressler@hki-jena.de](mailto:markus.gressler@hki-jena.de).

### Electronic supplementary information

#### Table of contents

|                                                                                                            |    |
|------------------------------------------------------------------------------------------------------------|----|
| <b>Table S1:</b> NMR data of <b>5</b> .....                                                                | 2  |
| <b>Table S2:</b> NMR data of <b>6</b> .....                                                                | 3  |
| <b>Table S3:</b> MALDI-TOF-based peptide identification of eEF1 $\alpha$ and eEF2 .....                    | 4  |
| <b>Table S4:</b> Molecular fingerprint similarity analysis with <b>1</b> and <b>7</b> .....                | 4  |
| <b>Table S5:</b> Predicted binding pocket for <b>1</b> in <i>A. nidulans</i> eEF2 .....                    | 5  |
| <b>Figure S1:</b> <sup>1</sup> H NMR spectrum of <b>5</b> .....                                            | 6  |
| <b>Figure S2:</b> <sup>13</sup> C NMR spectrum of <b>5</b> .....                                           | 7  |
| <b>Figure S3:</b> <sup>1</sup> H, <sup>1</sup> H COSY spectrum of <b>5</b> .....                           | 8  |
| <b>Figure S4:</b> <sup>1</sup> H, <sup>13</sup> C HMBC spectrum of <b>5</b> .....                          | 9  |
| <b>Figure S5:</b> ESI-MS data of <b>5</b> .....                                                            | 10 |
| <b>Figure S6:</b> <sup>1</sup> H NMR spectrum of <b>6</b> .....                                            | 11 |
| <b>Figure S7:</b> <sup>13</sup> C NMR spectrum of <b>6</b> .....                                           | 12 |
| <b>Figure S8:</b> <sup>1</sup> H, <sup>1</sup> H COSY spectrum of <b>6</b> .....                           | 13 |
| <b>Figure S9:</b> <sup>1</sup> H, <sup>13</sup> C HMBC spectrum of <b>6</b> .....                          | 14 |
| <b>Figure S10:</b> ESI-MS data of <b>6</b> .....                                                           | 15 |
| <b>Figure S11:</b> MALDI-TOF-based peptide fingerprinting of eEF2.....                                     | 16 |
| <b>Figure S12:</b> Phylogenetic analysis of fungal eEF2s .....                                             | 17 |
| <b>Figure S13:</b> Optimization of cultivation conditions of reporter strain <i>A. nidulans</i> tMD03..... | 18 |
| <b>Figure S14:</b> Expression analyses by qRT-PCR.....                                                     | 18 |
| <b>Figure S15:</b> <i>In vivo</i> inhibition of protein biosynthesis in <i>A. nidulans</i> .....           | 19 |
| <b>Figure S16:</b> Recovery of <i>A. nidulans</i> in the presence of <b>1</b> and <b>2</b> .....           | 19 |
| <b>Scheme S1:</b> Synthesis route for compound <b>6</b> .....                                              | 20 |
| <b>References</b> .....                                                                                    | 20 |

**Table S1.** NMR data of **5** in CD<sub>3</sub>OD. <sup>a</sup>3-OH and 3'-OH not observed; <sup>b</sup> not assigned due to signal overlap.

| no.                | $\delta_C$ type                  | $\delta_H$ (J in Hz)                           | HMBC                     |
|--------------------|----------------------------------|------------------------------------------------|--------------------------|
| 1                  | 192.6, CH                        | 9.86 s                                         | 1, 2, 3, 4               |
| 2                  | 134.6, qC                        |                                                |                          |
| 3                  | 73.3, CH <sup>a</sup>            | 4.31 dd (2.3; 7.3)                             | 2, 4, 9                  |
| 4                  | 169.5, qC                        |                                                |                          |
| 5                  | 71.3, CH                         | 6.33 m                                         | 2, 4, 6                  |
| 6                  | 46.3, CH <sub>2</sub>            | a: 2.15 dd (5.8; 9.4)<br>b: 2.74 dd (6.9; 9.3) | b: 4, 8, (1')<br>a: 5, 6 |
| 7                  | 41.1, qC                         |                                                |                          |
| 8                  | 21.3, CH <sub>3</sub>            | 1.20                                           | 4, 6, 7                  |
| 9                  | 47.6, CH                         | 2.48 m                                         | 8, (3), (6), (11)        |
| 10                 | 41.9, CH <sub>2</sub>            | 1.53-1.42 m                                    | 10, 13, 14, 15           |
| 11                 | 40.6, qC                         |                                                |                          |
| 12                 | 47.4, CH <sub>2</sub>            | a: 1.24 dd (9.0; 10.3)<br>b: 1.84 m            | b: 9, 15<br>a: 3, 15     |
| 13                 | 50.2, CH                         | 2.34-2.38 m                                    | 3, 12                    |
| 14                 | 29.9, CH <sub>3</sub>            | 1.12 s                                         | 9, 11, 15                |
| 15                 | 27.6, CH <sub>3</sub>            | 1.00 s                                         | 9, 11, 14                |
| 1'                 | 169.8, qC                        |                                                |                          |
| 2'                 | 114.9, qC                        |                                                |                          |
| 3'                 | 161.8, qC <sup>a</sup>           |                                                |                          |
| 4'                 | 108.8, CH                        | 6.52 d (2.0)                                   | 3', 5', 6'               |
| 5'                 | 155.3, qC                        |                                                |                          |
| 6'                 | 116.7, CH                        | 6.49 d (1.9)                                   | 2', 4', 5', 8'           |
| 7'                 | 142.4, qC                        |                                                |                          |
| 8'                 | 22.3, CH <sub>3</sub>            | 2.40 s                                         | 6', 7'                   |
| 1''                | 172.7, qC                        |                                                |                          |
| 2''                | 34.2, CH <sub>2</sub>            | 2.61                                           | 1'', 3'', 4''            |
| 3''                | 25.5, CH <sub>2</sub>            | 2.07                                           | 1'', 2'', 4'', 5''       |
| 4''                | 25.6, CH <sub>2</sub>            | 2.81                                           | 2'', 3'', 5'', 6''       |
| 5''                | 147.9, qC                        |                                                |                          |
| 6''                | 124.4, CH                        | 7.83 s                                         |                          |
| I                  | 41.2, CH <sub>2</sub>            | a) 2.66 m<br>b) 2.88 dd (4.3; 10.6)            | II, VII, VI              |
| II                 | 61.6, CH                         | 4.45 m                                         | I, IV, VII               |
| III                | NH                               | 6.20                                           |                          |
| IV                 | 166.1, qC                        |                                                |                          |
| V                  | NH                               | 6.16                                           |                          |
| VI                 | 63.3, CH                         | 4.25 m                                         | I, IV, VII               |
| VII                | 57.0, CH                         | 3.15 m                                         | IX, X                    |
| VIII               | 26.8, CH <sub>2</sub>            | 1.62 m                                         | VI, IX, X, XI            |
| IX                 | 29.8, CH <sub>2</sub>            | 1.40 m                                         | VII, XI                  |
| X                  | 29.5, CH <sub>2</sub>            | 1.67-1.72 m                                    | IX, (VII)                |
| XI                 | 36.7, CH <sub>2</sub>            | 2.18 t (6.0)                                   |                          |
| XII                | 176.1, qC                        |                                                |                          |
| XIII               | NH                               | 8.45                                           |                          |
| XIV                | 40.3, CH <sub>2</sub>            | 3.31 m                                         | XVI-XIX, XII             |
| XV                 | 70.6, CH <sub>2</sub>            | 3.48 t(4.63)                                   | XIV, XVI-XIX             |
| XVI <sup>b</sup>   |                                  |                                                |                          |
| XVII <sup>b</sup>  |                                  |                                                |                          |
| XVIII <sup>b</sup> | 71.5 – 71.2, 4 x CH <sub>2</sub> | 3.54-3.59 m                                    | XVI-XIX                  |
| XIX <sup>b</sup>   |                                  |                                                |                          |
| XX                 | 70.4, CH <sub>2</sub>            | 3.85 m                                         | XXI, XIX                 |
| XXI                | 51.4, CH <sub>2</sub>            | 4.55 m                                         | XX, C6''                 |

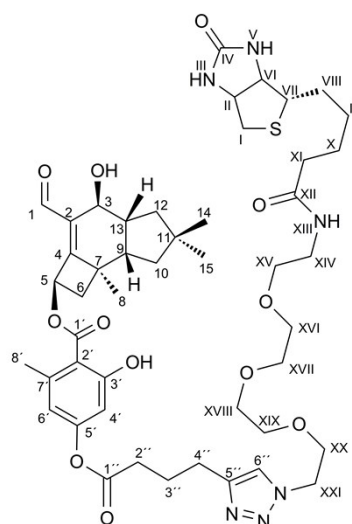

**Table S2.** NMR data of **6** in CD<sub>3</sub>OD. <sup>a</sup>not assigned due to signal overlap.

| no.                | $\delta_C$ , type              | $\delta_H$ (J in Hz)               | HMBC                  |
|--------------------|--------------------------------|------------------------------------|-----------------------|
| 1                  | 14.1, CH <sub>3</sub>          | 0.98 t (7.4)                       | 2, 3                  |
| 2                  | 19.8, CH <sub>2</sub>          | 1.47 sext (7.5)                    | 3, 4, 1               |
| 3                  | 31.3, CH <sub>2</sub>          | 1.74 quin (6.6)                    | 1, 2, 4               |
| 4                  | 65.5, CH <sub>2</sub>          | 4.30 t (6.6)                       | 2, 3, 1'              |
| 1'                 | 166.3, qC                      |                                    |                       |
| 2'                 | 128.8, qC                      |                                    |                       |
| 3'                 | 131.5, CH                      | 8.05 d (8.7)                       | 7', 6', 4', 5', 2'    |
| 4'                 | 122.2, CH                      | 7.17 d (8.7)                       | 6', 2', 5', 1', (1'') |
| 5'                 | 154.9, qC                      |                                    |                       |
| 6'                 | 122.2, CH                      | 7.17 d (8.7)                       | 4', 2', 5', 1', (1'') |
| 7'                 | 131.5, HC                      | 8.05 d (8.7)                       | 3', 6', 4', 5', 2'    |
| 8'                 |                                |                                    |                       |
| 1''                | 172.0, qC                      |                                    |                       |
| 2''                | 34.1, CH <sub>2</sub>          | 2.67 t (7.5)                       | 1'', 3'', 4''         |
| 3''                | 25.1, CH <sub>2</sub>          | 2.12 m                             | 1'', 2'', 4'', 5''    |
| 4''                | 25.3, CH <sub>2</sub>          | 2.83 t (7.5)                       | 2'', 3'', 6''         |
| 5''                | 147.3, qC                      |                                    |                       |
| 6''                | 122.7, CH                      | 7.55 s                             | 5''                   |
| I                  | 41.1, CH <sub>2</sub>          | a) 2.71 s<br>b) 2.90 dd (5.1; 7.8) | II, VI, VII<br>II     |
| II                 | 60.7, CH                       | 4.47 m                             | I, VII, IV (VI)       |
| III                | NH                             | 6.02                               |                       |
| IV                 | 164.1, qC                      |                                    |                       |
| V                  | NH                             | 6.2                                |                       |
| VI                 | 62.3, CH                       | 4.30 m                             | I, VII, IV, (II)      |
| VII                | 56.0, CH                       | 3.15 dt (4.6; 7.4)                 | IX, X                 |
| VIII               | 26.1, CH <sub>2</sub>          | 1.64 m                             | VII, VI, IX, X, XI    |
| IX                 | 28.6, CH <sub>2</sub>          | 1.43 m                             | VIII, X, XI, VII      |
| X                  | 28.6, CH <sub>2</sub>          | 1.62-1.75 m                        |                       |
| XI                 | 36.3, CH <sub>2</sub>          | 2.18 t (7.5)                       | X, IX, VIII, XII      |
| XII                | 173.4, qC                      |                                    |                       |
| XIII               | NH                             | 6.43 s                             | XII                   |
| XIV                | 39.8, CH <sub>2</sub>          | 3.38 quar (5.2)                    | XV, XII               |
| XV                 | 70.4, CH <sub>2</sub>          | 3.51 t (5.2)                       | XVI-XIX, XIV          |
| XVI <sup>a</sup>   |                                |                                    |                       |
| XVII <sup>a</sup>  |                                |                                    |                       |
| XVIII <sup>a</sup> | 71.2-70.7, 4 x CH <sub>2</sub> | 3.55-3.60 m                        | XVI-XIX               |
| XIX <sup>a</sup>   |                                |                                    |                       |
| XX                 | 70.1, CH <sub>2</sub>          | 3.86 t (5.2)                       | XXI, XVI-XIX          |
| XXI                | 50.8, CH <sub>2</sub>          | 4.51 t (5.2)                       | XX, C6''              |

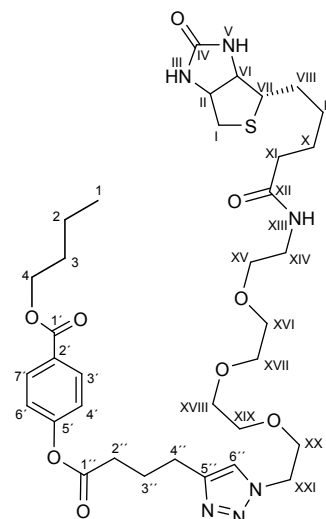

**Table S3. MALDI-TOF-based peptide identification of eEF1 $\alpha$  and eEF2 in protein fractions after elution from 5-labelled streptavidin beads.** The sequence coverage (SC) and the root mean square at 90% (RMS90), which is used to compare distributions without large non-gaussian tails dominating, are indicated.

| band no. | identified protein                                                                         | pI  | MW [kDa] | Meta Score | Peptides | SC [%] | RMS90 [ppm] |
|----------|--------------------------------------------------------------------------------------------|-----|----------|------------|----------|--------|-------------|
| 1        | TPA: elongation factor 1-alpha (eEF 1 $\alpha$ )<br>[ <i>Aspergillus nidulans</i> FGSC A4] | 9.9 | 50.5     | 55.0       | 5        | 15.0   | 5.87        |
| 2        | EF2_NEUCR Elongation factor 2 (eEF 2)<br>[ <i>Aspergillus nidulans</i> FGSC A4]            | 6.2 | 93.8     | 199.0      | 19       | 29.4   | 10.38       |

**Table S4. Molecular fingerprint (FP) similarity analysis of 1 and 7 by encoding them into Morgan and 2D Pharmacophore FPs.** Tanimoto similarity values higher than 0.5 could be used as cut-off for similarity when Morgan FPs are used. Dice coefficients may have a higher cut-off depending on the FPs used to encode the given molecules.

| Similarity metric | 2D Pharmacophore | Morgan |
|-------------------|------------------|--------|
| Tanimoto          | 0.147            | 0.164  |
| Dice              | 0.257            | 0.283  |

**Table S5. Predicted binding pockets for 1 in *A. nidulans* eEF2 model by the Achilles blind docking server.** Ranks for the first seven binding pockets are given along with their predicted free energies of binding (BE). 5 Å residues around the predicted binding coordinates for 1 in *A. nidulans* eEF2 are listed. Residue numbering is shown in accordance with *A. nidulans* eEF2 (*An*), *C. albicans* eEF2 (*Ca*) and *S. cerevisiae* eEF2 (*Sc*). Amino acid residues differences are highlighted in bold.

| # | BE   | organ.    | 5 Å residues from predicted DAO binding location |                 |                 |               |               |               |                |              |                 |                 |               |              |
|---|------|-----------|--------------------------------------------------|-----------------|-----------------|---------------|---------------|---------------|----------------|--------------|-----------------|-----------------|---------------|--------------|
| 1 | -8.3 | <i>An</i> | 466K                                             | 484FS           | 515SDPC         | 534 <b>AG</b> | 537LH         | 541IC         | 545D           | 550H         | 731F            | 795PQ <b>SV</b> |               |              |
|   |      | <i>Ca</i> | K                                                | FS              | SDPC            | <b>TG</b>     | LH            | IC            | D              | H            | F               | PQ <b>LI</b>    |               |              |
|   |      | <i>Sc</i> | K                                                | FS              | SDPC            | <b>TG</b>     | LH            | IC            | D              | H            | F               | PQ <b>MV</b>    |               |              |
| 2 | -7.5 | <i>An</i> | 171 <b>EKED</b>                                  | 250 <b>Y</b>    | 262 <b>QPE</b>  | 267GKP        | VER           | 275NM         |                |              |                 |                 |               |              |
|   |      | <i>Ca</i> | <b>TKED</b>                                      | <b>Y</b>        | <b>DKD</b>      | GKPLER        | NM            |               |                |              |                 |                 |               |              |
|   |      | <i>Sc</i> | <b>SKED</b>                                      | <b>F</b>        | <b>DTD</b>      | GKPLER        | NM            |               |                |              |                 |                 |               |              |
| 3 | -7.5 | <i>An</i> | 418N                                             | 484FSVS         | 565R            | 600 <b>K</b>  | 603 <b>EE</b> | 638GPD        | 643 <b>GAN</b> | 672T         | 681 <b>PMRS</b> | 799FDHW         |               |              |
|   |      | <i>Ca</i> | N                                                | FSVS            | R               | <b>L</b>      | <b>EN</b>     | GPD           | <b>GPN</b>     | T            | <b>NCRS</b>     | FDHW            |               |              |
|   |      | <i>Sc</i> | N                                                | FSVS            | R               | <b>L</b>      | <b>EN</b>     | GPD           | <b>GPN</b>     | T            | <b>EMRS</b>     | FDHW            |               |              |
| 4 | -7.1 | <i>An</i> | 42 <b>R</b>                                      | 79 <b>AKFA</b>  | 86D             | 224RQF        | 228 <b>VK</b> | 305E          | 327KFLP        | 333ADA       | 336LE           |                 |               |              |
|   |      | <i>Ca</i> | <b>K</b>                                         | <b>ASMT</b>     | D               | RQF           | <b>NK</b>     | E             | KFLP           | ADA          | LE              |                 |               |              |
|   |      | <i>Sc</i> | <b>R</b>                                         | <b>SEMS</b>     | D               | RQF           | <b>TR</b>     | E             | KFLP           | ADA          | LE              |                 |               |              |
| 5 | -7.0 | <i>An</i> | 492 <b>R</b>                                     | 536E            | 559 <b>DPVV</b> | 564Y          | 727E          | 752R          | 776NE          | 779F         | 805 <b>L</b>    | 816K            | 819 <b>QI</b> | 823 <b>E</b> |
|   |      | <i>Ca</i> | <b>V</b>                                         | E               | <b>PPVV</b>     | Y             | E             | R             | NE             | F            | <b>M</b>        | K               | <b>AI</b>     | <b>E</b>     |
|   |      | <i>Sc</i> | <b>V</b>                                         | E               | <b>PPVV</b>     | Y             | E             | R             | NE             | F            | <b>L</b>        | K               | <b>EI</b>     | <b>A</b>     |
| 6 | -7.0 | <i>An</i> | 165LLE                                           | 169 <b>QVEK</b> | 280D            | 283 <b>YK</b> | 286 <b>FQ</b> | 290 <b>TN</b> |                |              |                 |                 |               |              |
|   |      | <i>Ca</i> | LLE                                              | <b>QTTK</b>     | D               | <b>FR</b>     | <b>FA</b>     | <b>MN</b>     |                |              |                 |                 |               |              |
|   |      | <i>Sc</i> | LLE                                              | <b>QVSK</b>     | D               | <b>FR</b>     | <b>FT</b>     | <b>MN</b>     |                |              |                 |                 |               |              |
| 7 | -7.0 | <i>An</i> | 226F                                             | 229 <b>KF</b>   | 232KKF          | 251F          | 253P          | 276MFI        | 280DP          | 284 <b>K</b> | 303 <b>KIE</b>  |                 |               |              |
|   |      | <i>Ca</i> | F                                                | <b>KY</b>       | KKF             | F             | P             | MFI           | DP             | <b>R</b>     | <b>KLE</b>      |                 |               |              |
|   |      | <i>Sc</i> | F                                                | <b>RY</b>       | KKF             | F             | P             | MFI           | DP             | <b>R</b>     | <b>KLE</b>      |                 |               |              |

**A**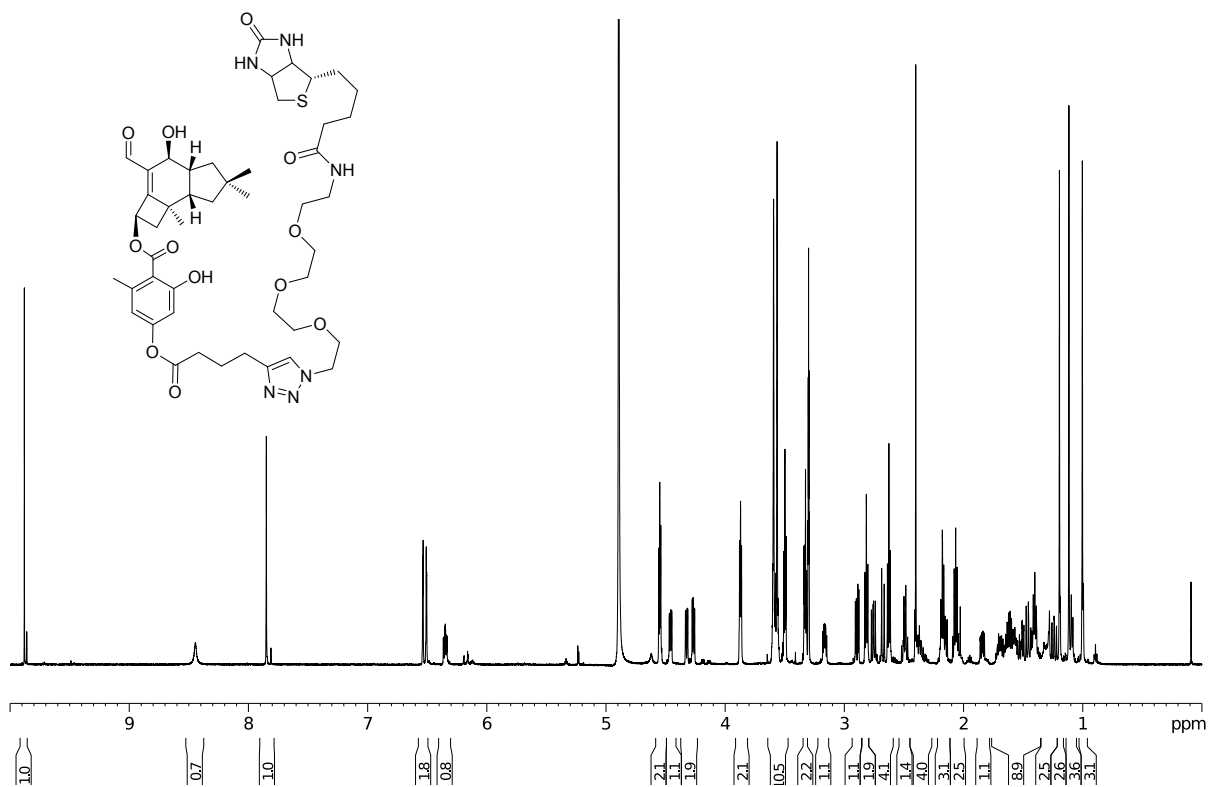**B**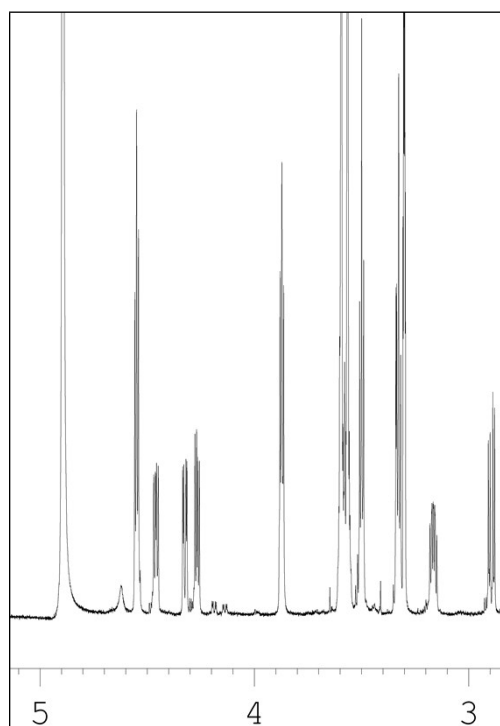**C**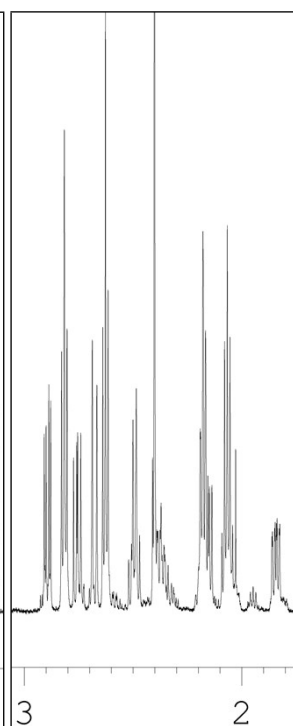**D**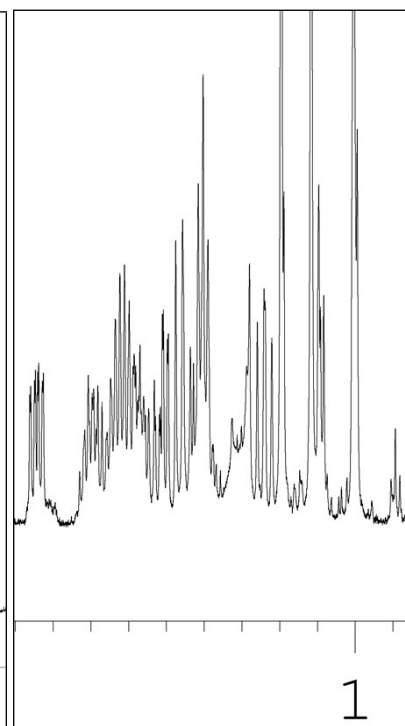

**Figure S1.** <sup>1</sup>H NMR spectra of **5** in CD<sub>3</sub>OD. **A.** Full range <sup>1</sup>H NMR spectrum of **5** in CD<sub>3</sub>OD. **B-D.** Close-up view of portions (5.0-3.0 ppm, 3.0-2.0 ppm, and 1.8-1.0 ppm) of the <sup>1</sup>H NMR spectrum of **5**.

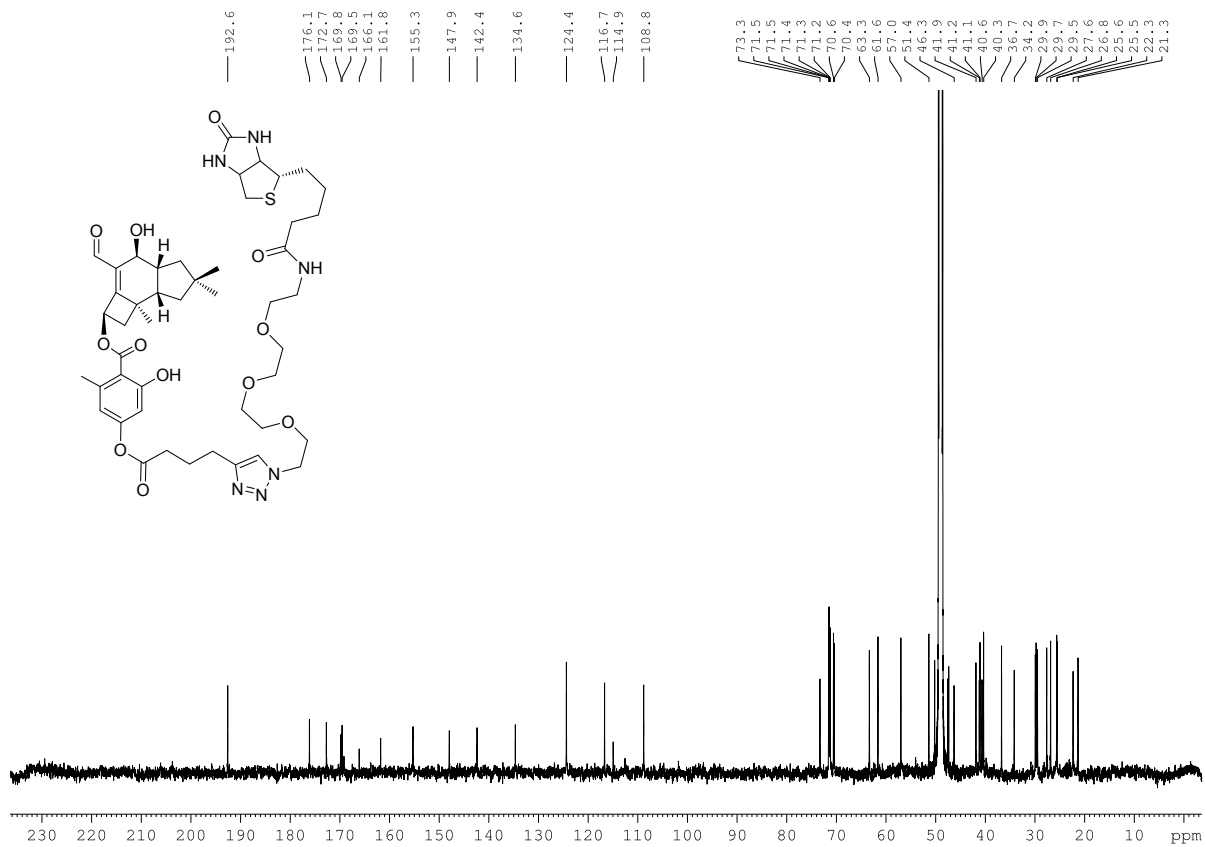

**Figure S2.**  $^1\text{H}$ -decoupled  $^{13}\text{C}$  NMR spectra of **5** in  $\text{CD}_3\text{OD}$ .

**A**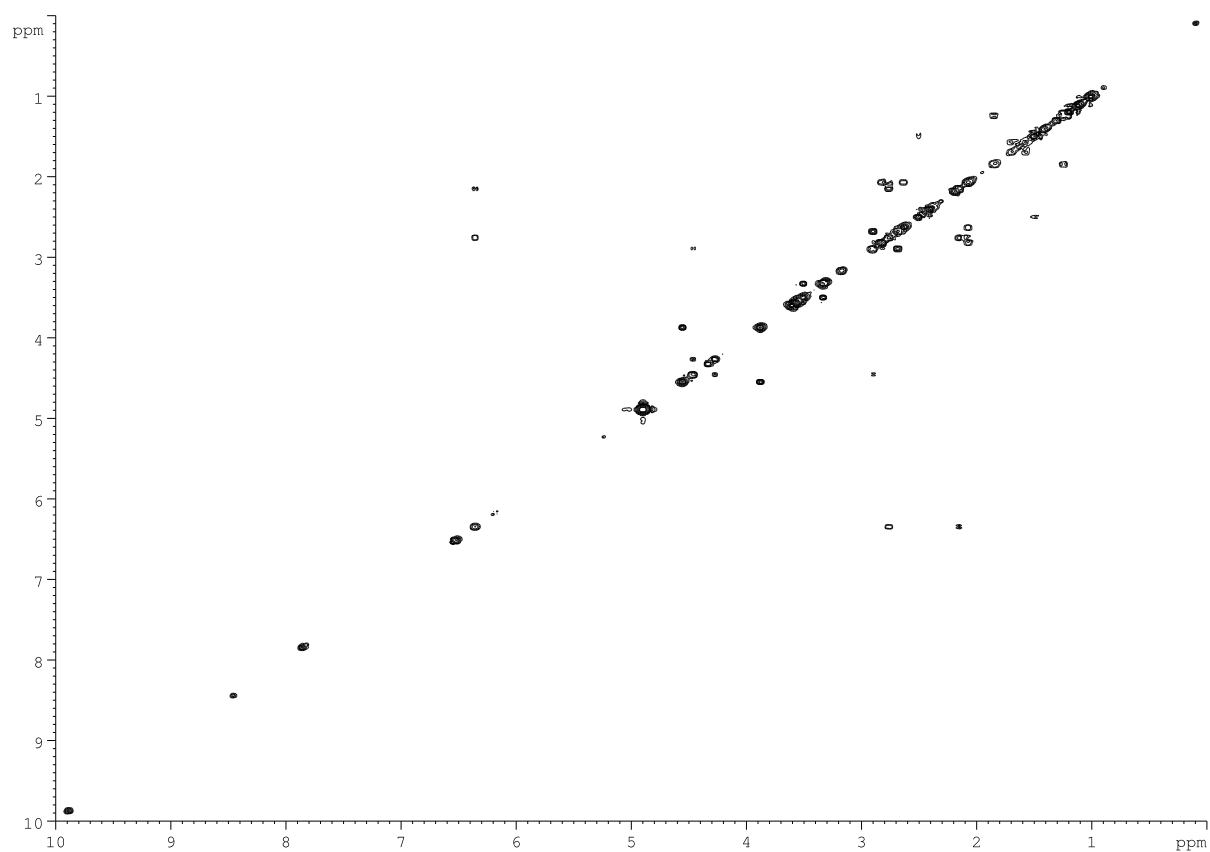**B**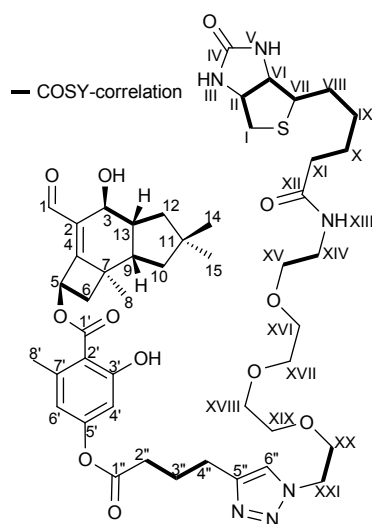

**Figure S3.**  $^1\text{H},^1\text{H}$  COSY spectrum of **5** in  $\text{CD}_3\text{OD}$ . **A.** Full range  $^1\text{H},^1\text{H}$  COSY spectrum of **5**. **B.** COSY key correlations.



**A**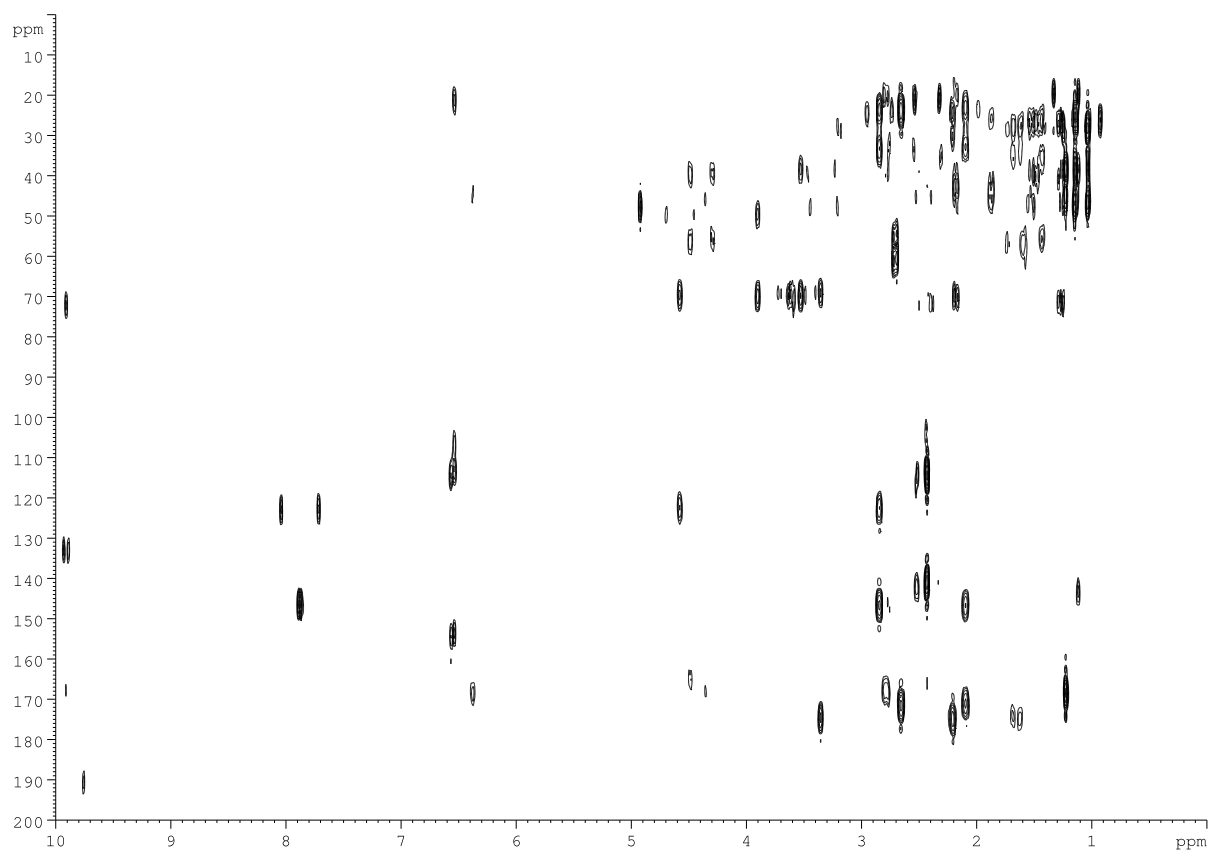**B**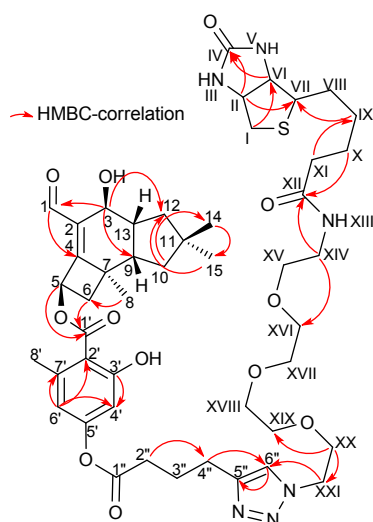

**Figure S4.**  $^1\text{H},^{13}\text{C}$  HMBC spectrum of **5** in  $\text{CD}_3\text{OD}$ . **A.** Full range  $^1\text{H},^{13}\text{C}$  HMBC spectrum of **5**. **B.** HMBC key correlations.

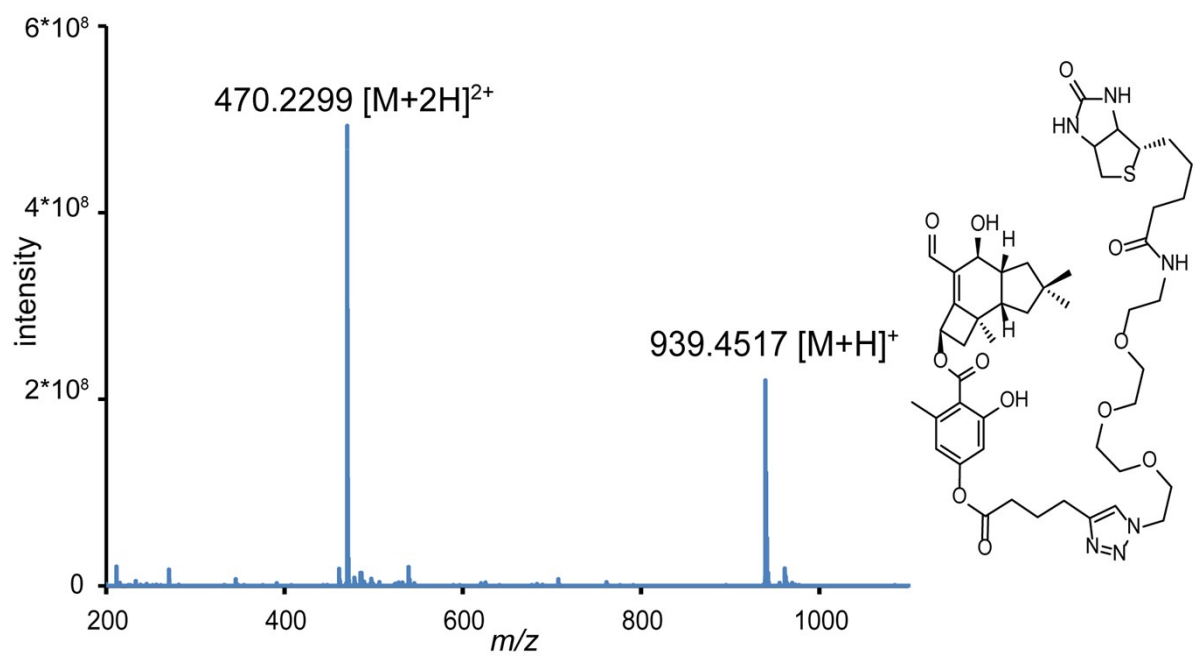

**Figure S5.** ESI-MS spectrum of 5.

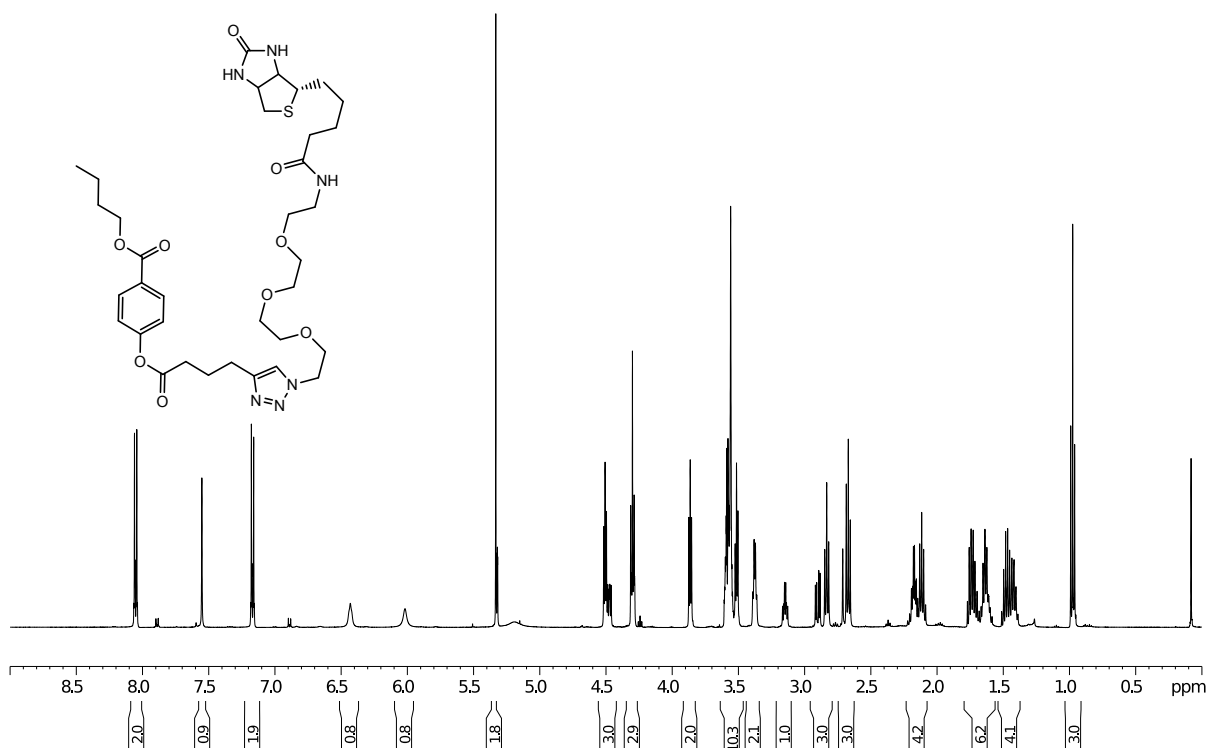

**Figure S6.** <sup>1</sup>H NMR spectrum of **6** in CD<sub>3</sub>OD.

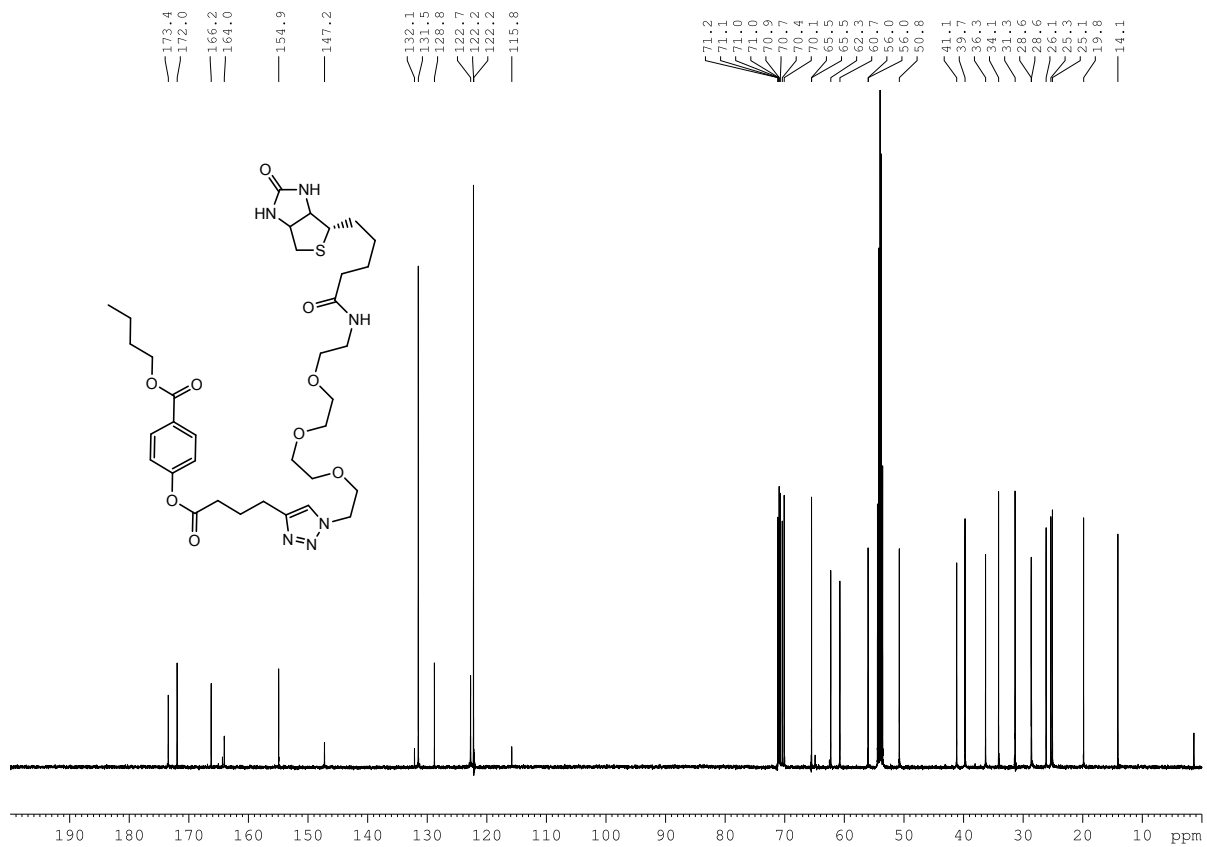

**Figure S7.**  $^1\text{H}$ -decoupled  $^{13}\text{C}$  NMR spectrum of **6** in  $\text{CD}_3\text{OD}$ .

**A**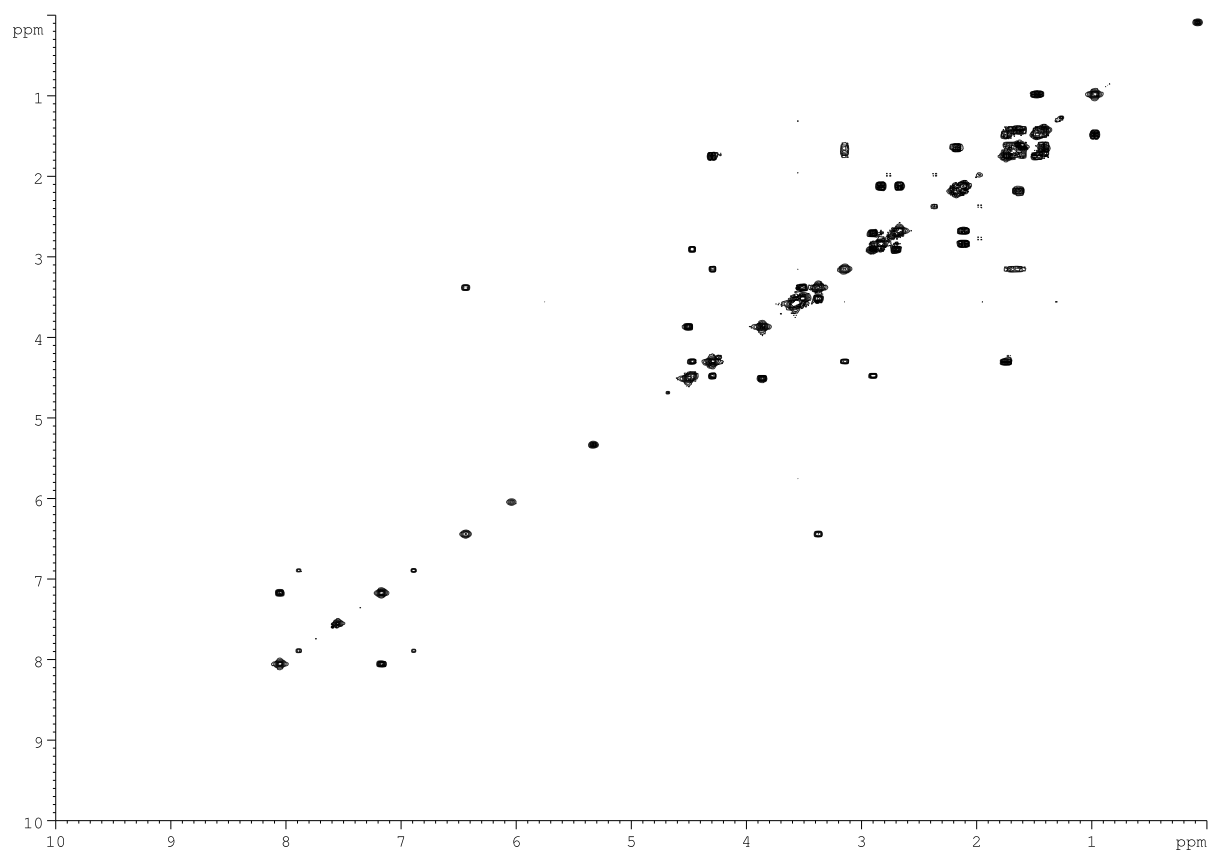**B**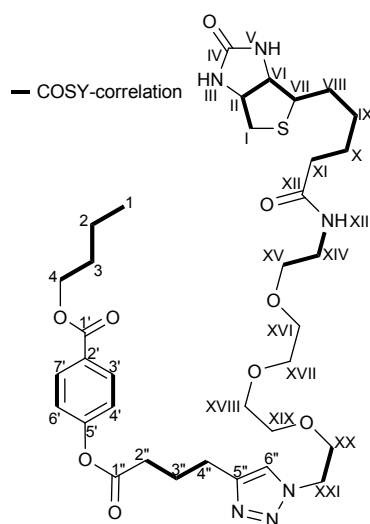

**Figure S8.**  $^1\text{H}$ ,  $^1\text{H}$  COSY spectrum of **6** in  $\text{CD}_3\text{OD}$ . **A.** Full range  $^1\text{H}$ ,  $^1\text{H}$  COSY spectrum of **6**. **B.** COSY key couplings in **6**.

**A**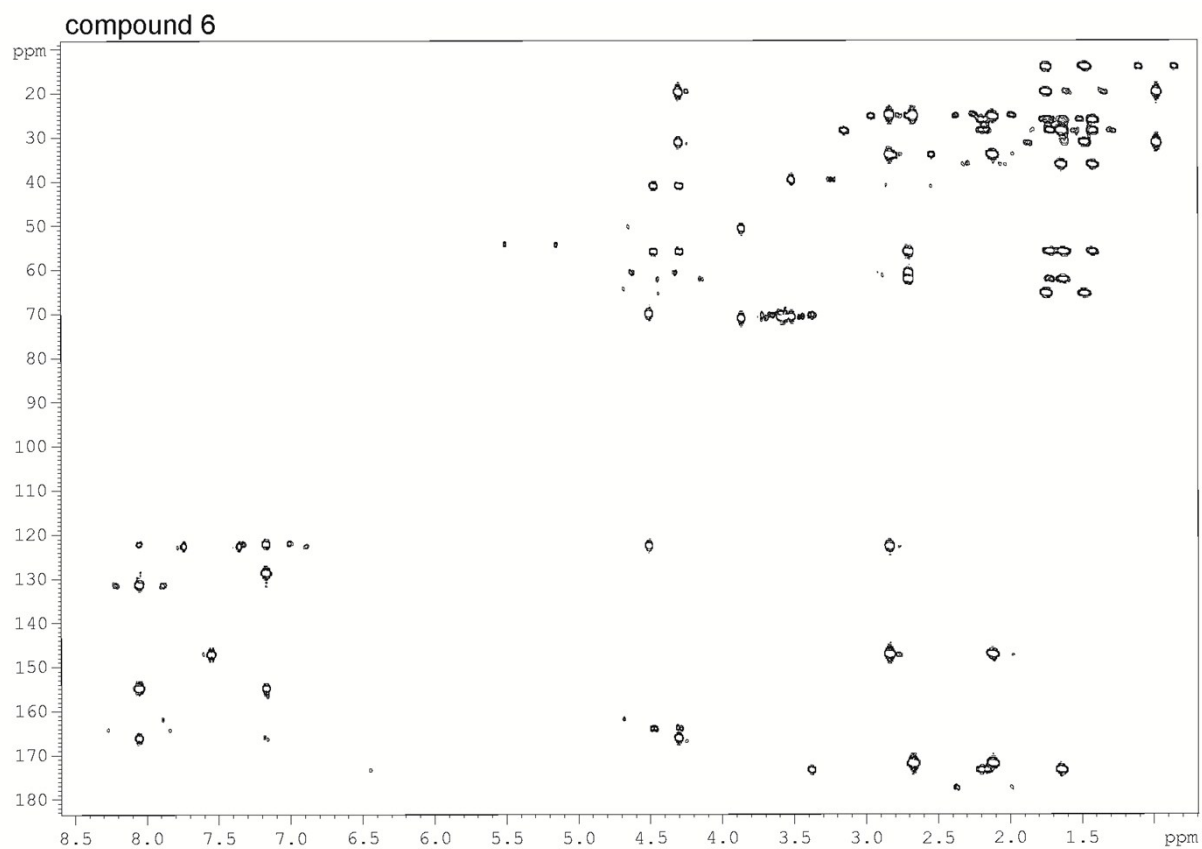**B**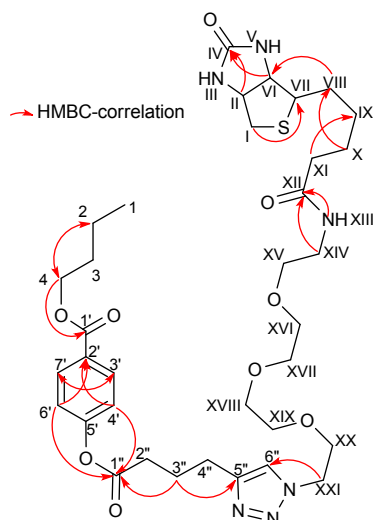

**Figure S9.**  $^1\text{H},^{13}\text{C}$  HMBC spectrum of **6** in  $\text{CD}_3\text{OD}$ . **A.** Full range  $^1\text{H},^{13}\text{C}$  HMBC spectrum. **B.** HMBC key correlations.

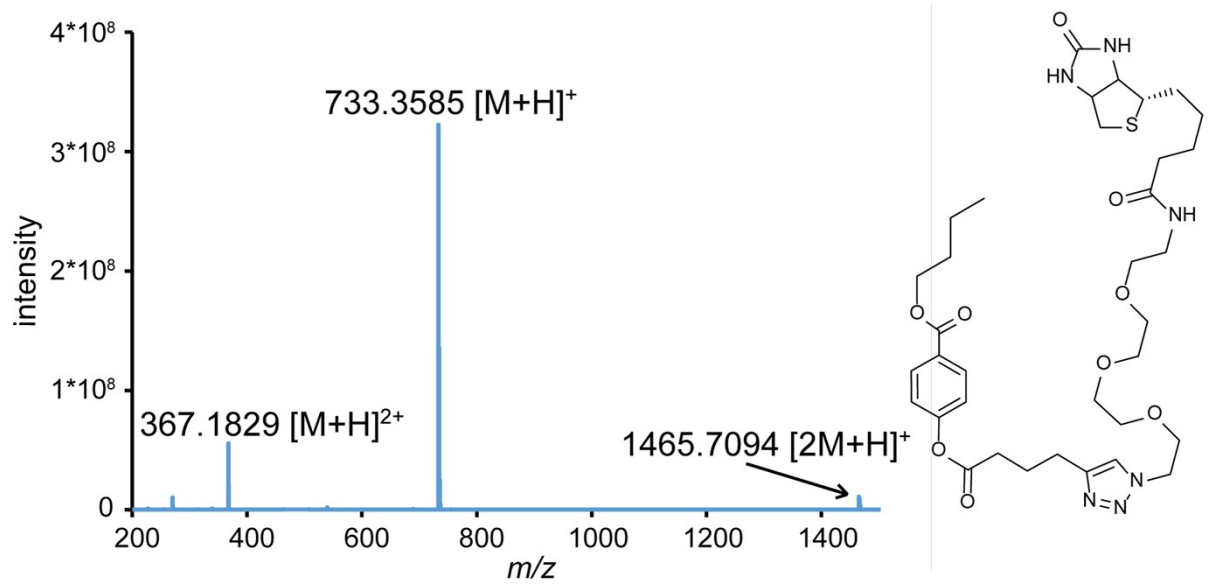

Figure S10. ESI-MS data of 6.

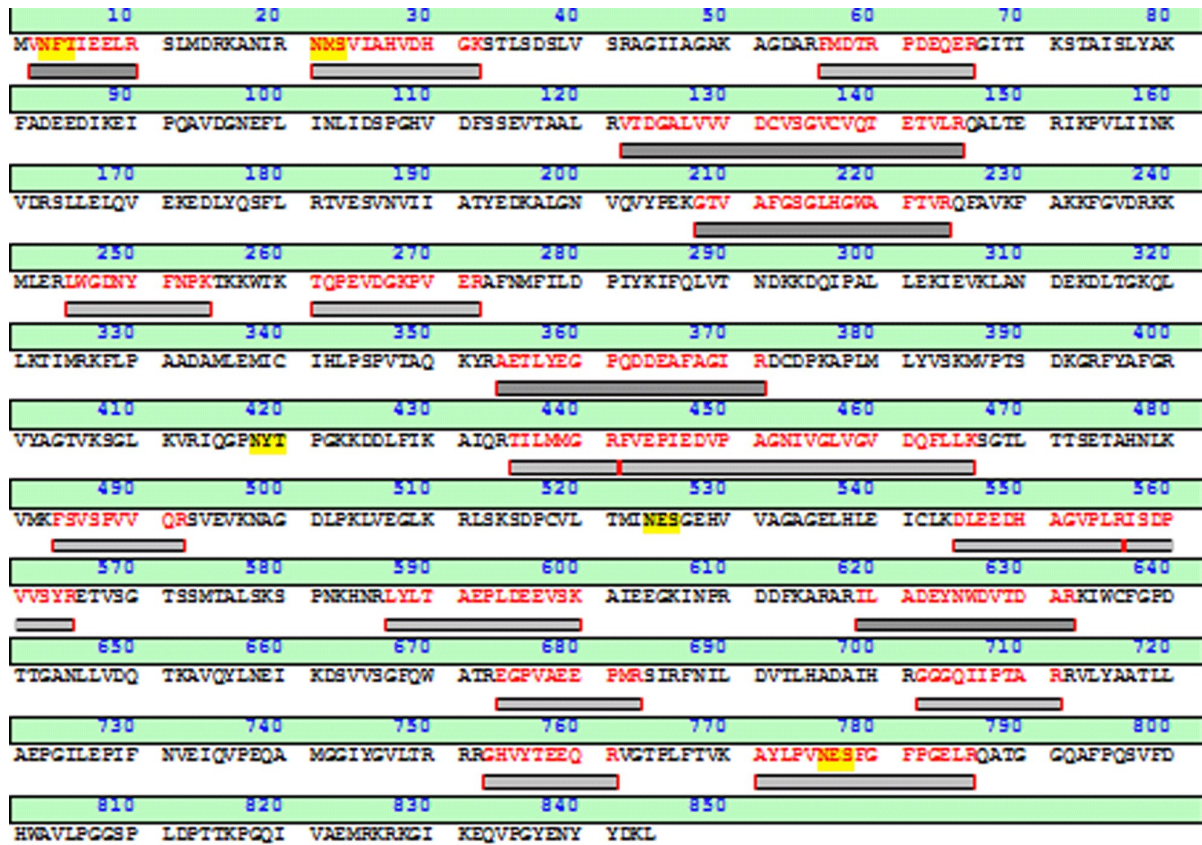

**Figure S11. MALDI-TOF-based peptide fingerprinting.** Identified peptides from *A. nidulans* eEF2 in protein pull-down fraction with 5-labelled streptavidin beads. Identified peptides from trypsin treated samples were aligned to *A. nidulans* eEF2 (highlighted in red). Grey bars indicate the reliance of the identified peptides: The darker the bar the lower is the difference between the measured  $m/z$  and the calculated  $m/z$ .



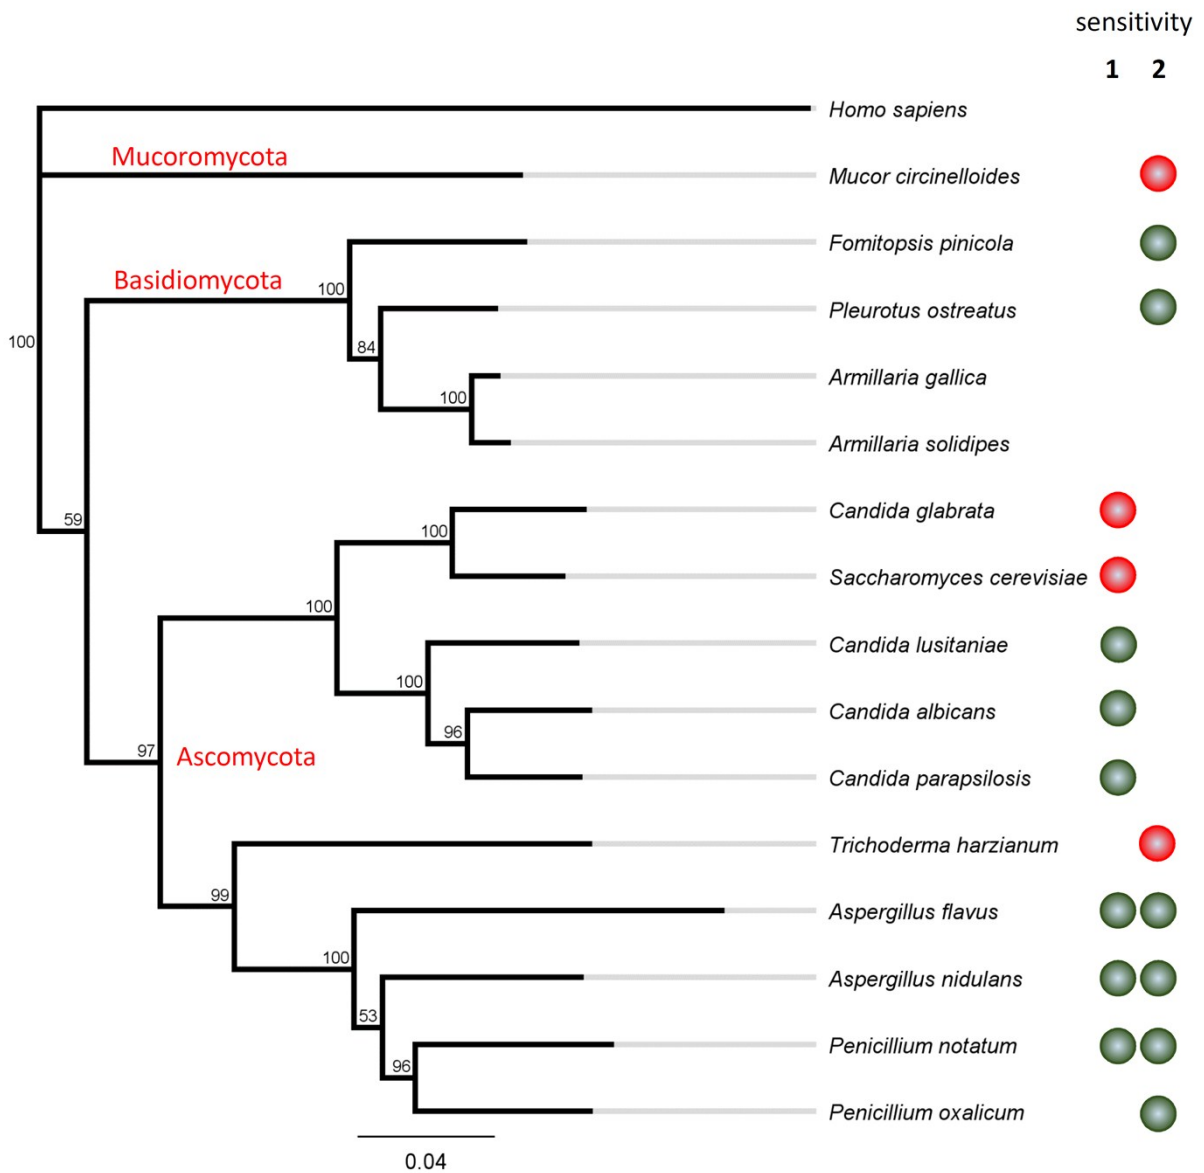

**Figure S12. Phylogenetic analysis of fungal eEF2 with documented resistance or sensitivity towards 1 (DAO) and 2 (arnamial).** Multiple amino acid sequence alignments were performed using the MUSCLE Alignment tool implemented in the Geneious 10.2.3 software carried out in default mode with a maximum of 1,000 iterations and 1,000 trees to be build. Phylogenetic analyses were performed with Geneious Tree Builder software using the Jukes-Cantor genetic distance model and the neighbour-joining method. The amino acid sequence of the human eEF2 was used as outgroup to root the tree. The bootstrap method was used as a resampling technique to estimate statistics on 1,000 replicates. Bootstrap values (consensus support in %) are given next to the branches in the consensus tree. Red and green spheres indicate resistance and sensitivity, respectively, towards 1 and 2 as reported by Misiek *et al.*<sup>1</sup>, Bohnert *et al.*<sup>2</sup>, and by this work (Figure 3 A).

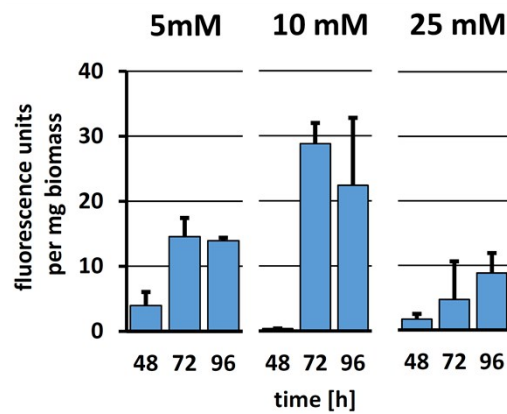

**Figure S13. Optimization of cultivation conditions.** *A. nidulans* tMD03 was cultivated for 48, 72, and 96 h in AMM containing 100 mM ethanol and 5, 10, or 25 mM D-glucose. Fluorescence units of cell-free total protein extracts were determined and normalised against the fungal biomass.

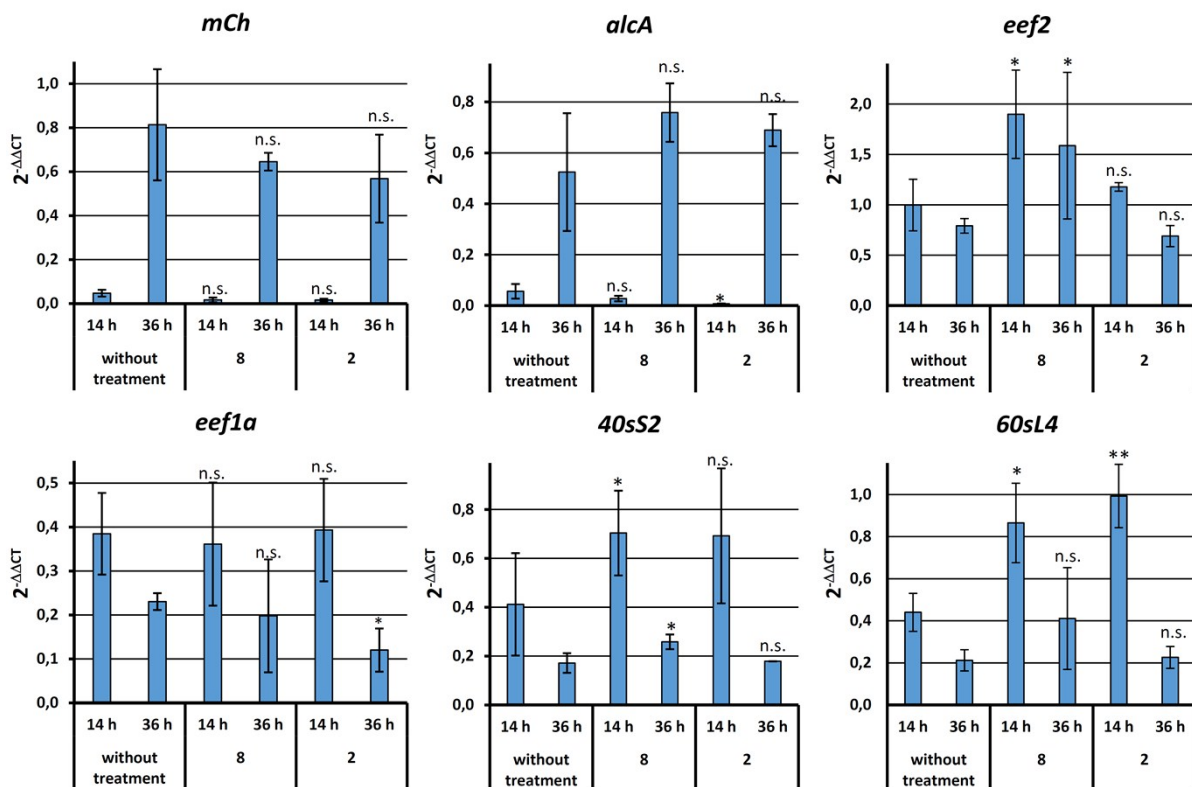

**Figure S14. Gene expression analyses by qRT-PCR.** *A. nidulans* tMD03 was pre-cultivated for 16 h in presence of 10 mM D-glucose and 100 mM ethanol. Compounds **8** (72  $\mu$ M) or **2** (22  $\mu$ M) were added, and cultures were grown for additional 14 or 36 h prior to expression analysis. Untreated cultures served as control. qRT-PCR targeted the genes for mCherry (*mCh*), alcohol dehydrogenase (*alcA*), eEF2 (*eef2*), eEF1 $\alpha$  (*eef1a*), and proteins for the small (*40sS2*) and large (*60sL4*) ribosomal subunits. Expression levels were normalised against two housekeeping genes, i.e., enolase (*enoA*) and glyceraldehyde-3-phosphate dehydrogenase (*gpdA*). Significance of gene expression levels were calculated against the respective untreated control by pairwise student's t-test (n.s.,  $p > 0.05$ ; \*,  $p < 0.05$ ; \*\*,  $p < 0.01$ ).

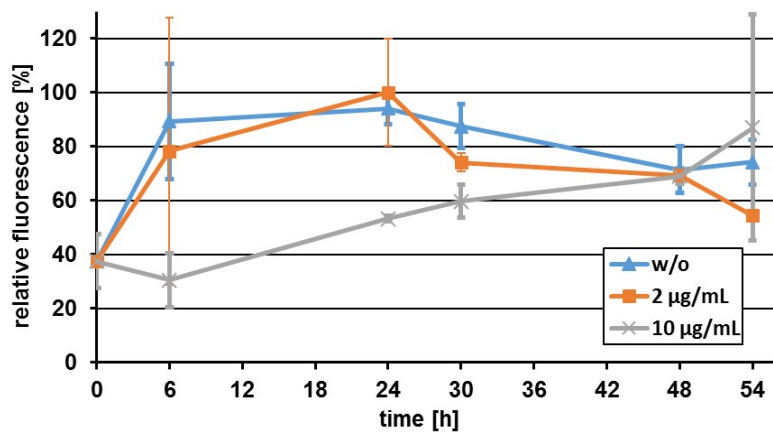

**Figure S15.** *In vivo* inhibition of protein biosynthesis in *A. nidulans* tMD03. The fungus was treated with **2** at 2 and 10 µg mL<sup>-1</sup>. The untreated control served as internal fluorescence reference standard. The experiment was carried out as described in Figure 4.

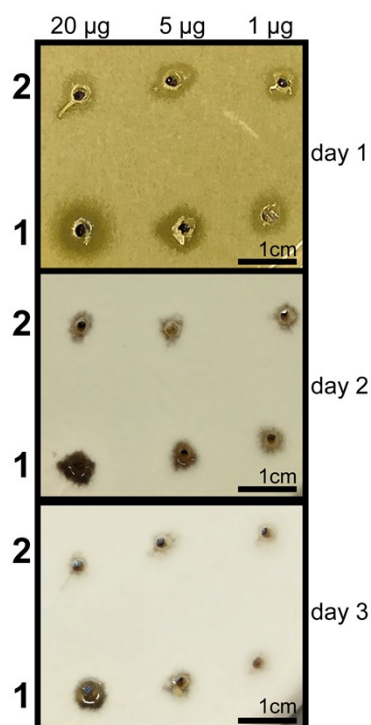

**Figure S16.** Recovery of *A. nidulans* in presence of **1** and **2**. AMM plates were inoculated with *A. nidulans* FGSC A4 at a concentration of  $1 \times 10^6$  conidia mL<sup>-1</sup>, and 20, 5 or 1 µg of **1** and **2** were supplied. Plates were incubated for 1, 2, or 3 days at 30 °C. The size of inhibition zones is time-dependently reduced, indicating a fungistatic activity of **1** and **2**.

**Scheme S1.** Synthesis route for compound **6**.

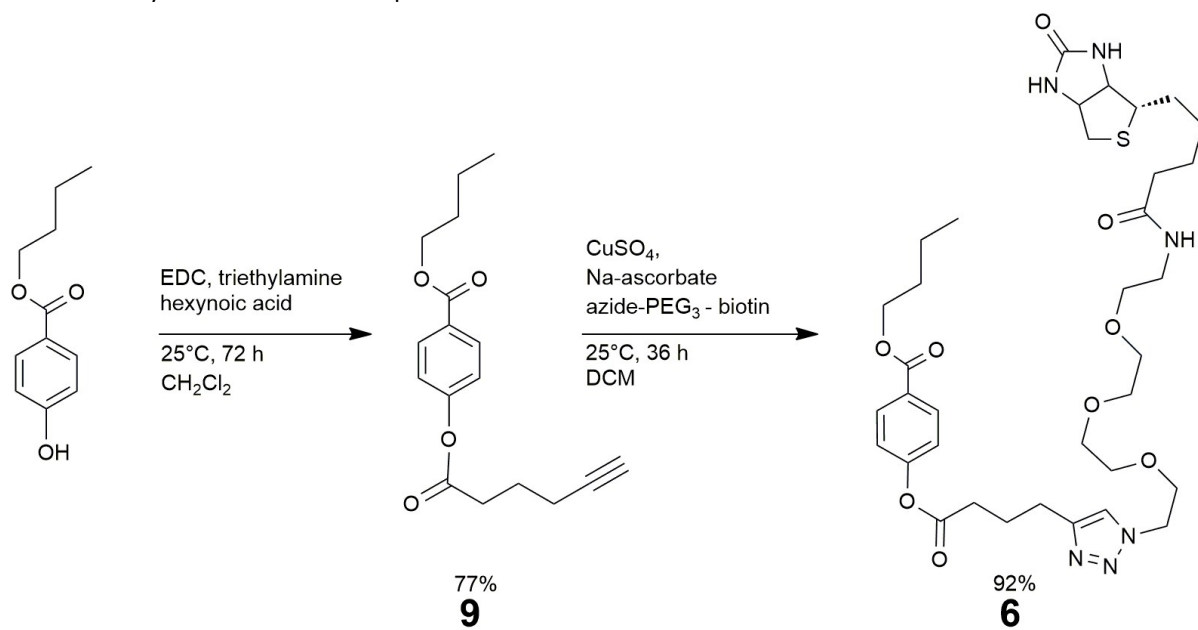

## References

1. Misiak, M.; Hoffmeister, D. *Mycol. Prog.* **2012**, *11*, 7.
2. Bohnert, M.; Nützmann, H. W.; Schroeckh, V.; Horn, F.; Dahse, H. M.; Brakhage, A. A.; Hoffmeister, D. *Phytochemistry* **2014**, *105*, 101.
